# Supplementary material for: Hounsfield Units Value is a Better Predictor of Bone Mineral Density Than the Vertebral Bone Quality Score of Magnetic Resonance Imaging in Patients with Lumbar Degenerative Diseases
Source: Research Square preprint supplement (doi:10.21203/rs.3.rs-1110968/v1), 2022-01-03
Supplement: Supplementary file 1 [file 121c0d1d26202a00050ad71d.xlsx]

## Sheet: Sheet1
No.	patient's ID	age(years)	gender(M:male F:female)	BMI(kg/m2)	L1HU			L1SI			CSFSI			L1VBQ	L1T-score	L1BMD	L2HU			L2SI			CSFSI			L2VBQ	L2T-score	L2BMD	L3HU			L3SI			CSFSI			L3VBQ	L3T-score	L3BMD	L4HU			L4SI			CSFSI
					first	second	average	first	second	average	first	second	average				first	second	average	first	second	average	first	second	average				first	second	average	first	second	average	first	second	average				first	second	average	first	second	average	first	second	average
1	20000950	63	male	22.49	157.98	161.22	159.6	410.7	415.4	413.05	156.9	159.1	158	2.61424	0.6	1.136	142.08	146.25	144.165	473.4	476.6	475	156.9	159.1	158	3.00633	1	1.209	145.1	141.03	143.065	455.6	459.2	457.4	156.9	159.1	158	2.89494	1.5	1.268	114.23	114.23	114.23	441.7	451.8	446.75	156.9	159.1	158
2	20021656	63	female	27.34	127.36	120.1	123.73	271.2	271.6	271.4	75.4	73.4	74.4	3.64785	-0.5	0.934	102.74	106.74	104.74	273.9	305.3	289.6	75.4	73.4	74.4	3.89247	0.2	1.048	80.84	79.19	80.015	287	314.3	300.65	75.4	73.4	74.4	4.04099	1	1.195	100.28	94.43	97.355	339.1	331.4	335.25	75.4	73.4	74.4
3	20021798	66	female	28.44	109.04	103.18	106.11	509.6	512.2	510.9	164.2	169	166.6	3.06663	-3.6	0.59	90.7	100.82	95.76	474	475.7	474.85	164.2	169	166.6	2.85024	-3.5	0.64	101.95	99.26	100.605	449.8	466.9	458.35	164.2	169	166.6	2.7512	-2.9	0.761	101.59	96.59	99.09	515.2	505.8	510.5	164.2	169	166.6
4	20022508	62	male	27.12	113.48	120.47	116.975	357.1	375.3	366.2	163.5	175.3	169.4	2.16175	-2	0.857	114.11	112.42	113.265	352.5	361	356.75	163.5	175.3	169.4	2.10596	-1.2	0.958	105.09	110.99	108.04	337.3	346.3	341.8	163.5	175.3	169.4	2.01771	-0.7	1.024	84.6	99.21	91.905	363.9	373.2	368.55	163.5	175.3	169.4
5	20022898	56	female	35.16	155.33	154.46	154.895	341.3	340.4	340.85	102	110.2	106.1	3.21254	0.3	1.02	150.33	148.15	149.24	331.3	332	331.65	102	110.2	106.1	3.12582	0.6	1.089	136.76	134.59	135.675	353.1	337.6	345.35	102	110.2	106.1	3.25495	0.8	1.174	120.69	122.05	121.37	363.7	363.1	363.4	102	110.2	106.1
6	20023406	67	male	26.42	108.98	113.48	111.23	327.4	338	332.7	167.6	161.2	164.4	2.02372	-2.6	0.789	112.14	113.12	112.63	301.7	299	300.35	167.6	161.2	164.4	1.82695	-2	0.875	100.77	102.16	101.465	339.3	350.5	344.9	167.6	161.2	164.4	2.09793	-1.8	0.905	111.56	116.7	114.13	350.9	374.5	362.7	167.6	161.2	164.4
7	20005996	67	female	29.27	136.35	134.99	135.67	344.8	341.8	343.3	158.3	147.1	152.7	2.2482	-0.8	0.897	132.62	133.64	133.13	375	354.4	364.7	158.3	147.1	152.7	2.38834	-0.5	0.978	139.65	148.59	144.12	357.6	351.4	354.5	158.3	147.1	152.7	2.32155	0.1	1.097	135.88	145.36	140.62	410	412	411	158.3	147.1	152.7
8	20001511	72	female	28.13	100.74	98.6	99.67	341.2	371.2	356.2	91.8	81.3	86.55	4.11554	-1.9	0.785	82.46	88.34	85.4	357.3	378.3	367.8	91.8	81.3	86.55	4.24957	-1.4	0.873	87.69	97.46	92.575	372.8	378.5	375.65	91.8	81.3	86.55	4.34027	-0.8	1	94.63	104.36	99.495	344.4	338.3	341.35	91.8	81.3	86.55
9	20022898	56	female	35.16	154.08	152.27	153.175	343.4	339.5	341.45	99	95.4	97.2	3.51286	0.3	1.02	138.54	145.86	142.2	331	333.3	332.15	99	95.4	97.2	3.41718	0.6	1.089	135.87	134.62	135.245	352.4	337.4	344.9	99	95.4	97.2	3.54835	0.8	1.174	119.51	120.39	119.95	362.5	361.1	361.8	99	95.4	97.2
10	20023410	65	male	23.15	69.76	70.59	70.175	425	438.1	431.55	165	177.6	171.3	2.51926	-2.2	0.833	54.04	60.79	57.415	428.6	451	439.8	165	177.6	171.3	2.56743	-2.7	0.799	64.44	60.61	62.525	379.1	386.8	382.95	165	177.6	171.3	2.23555	-2.3	0.855	57.53	67.42	62.475	333.6	363.1	348.35	165	177.6	171.3
11	20024572	68	female	28.84	110.4	113.82	112.11	382.9	392.6	387.75	101.5	114.4	107.95	3.59194	-2.4	0.723	127.86	119.52	123.69	408.2	423.6	415.9	101.5	114.4	107.95	3.85271	-1.1	0.904	122.28	115.01	118.645	405.6	412.1	408.85	101.5	114.4	107.95	3.7874	-1.6	0.905	106.24	101.27	103.755	401.5	407.8	404.65	101.5	114.4	107.95
12	20024768	66	female	22.31	113.2	112.03	112.615	501.7	462.5	482.1	184.5	200.1	192.3	2.50702	-1.7	0.801	98.01	99.72	98.865	508.9	525.2	517.05	184.5	200.1	192.3	2.68877	-1.4	0.87	109.89	116.6	113.245	501.7	529.7	515.7	184.5	200.1	192.3	2.68175	-0.5	1.025	111.31	114.98	113.145	534.3	529.8	532.05	184.5	200.1	192.3
13	20025252	66	female	29.97	118.94	116.2	117.57	299.4	323.4	311.4	89.4	76.1	82.75	3.76314	-2.4	0.73	100.45	98.32	99.385	357.8	330.5	344.15	89.4	76.1	82.75	4.15891	-2.3	0.78	81.78	83.59	82.685	368.7	370.2	369.45	89.4	76.1	82.75	4.46465	-3.2	0.735	93.69	92.29	92.99	356.7	359.8	358.25	89.4	76.1	82.75
14	20026211	56	male	26.15	147.94	145.39	146.665	302.8	307.3	305.05	109.5	97.8	103.65	2.94308	-1	0.967	130.99	140.5	135.745	322.2	325.9	324.05	109.5	97.8	103.65	3.12639	-0.3	1.059	127.8	149.01	138.405	334.5	338.9	336.7	109.5	97.8	103.65	3.24843	0	1.102	131.95	136.92	134.435	322	326.7	324.35	109.5	97.8	103.65
15	20017833	60	female	32.03	80.24	78.42	79.33	426.7	416.2	421.45	114.9	106.7	110.8	3.8037	-1.5	0.82	74.88	76.25	75.565	407.6	378	392.8	114.9	106.7	110.8	3.54513	-1.5	0.859	54.11	55.77	54.94	382.2	374	378.1	114.9	106.7	110.8	3.41245	-0.9	0.982	77.94	84.84	81.39	358.7	342.6	350.65	114.9	106.7	110.8
16	20017959	62	male	28.02	120.54	116.23	118.385	324.4	340.7	332.55	84.8	103	93.9	3.54153	-2.2	0.835	108.37	113.22	110.795	336.8	316.3	326.55	84.8	103	93.9	3.47764	-1.9	0.881	106.81	101.14	103.975	316.7	318.8	317.75	84.8	103	93.9	3.38392	-1.9	0.889	119.04	110.31	114.675	282.5	278.6	280.55	84.8	103	93.9
17	20016464	55	female	28.58	103.63	104.48	104.055	469.2	445.9	457.55	166	148.6	157.3	2.90877	-1.7	0.804	99.05	98.66	98.855	413.4	388	400.7	166	148.6	157.3	2.54736	-1.4	0.871	93.84	100.13	96.985	373.5	369.6	371.55	166	148.6	157.3	2.36205	-2.5	0.812	114.77	115.54	115.155	360.6	369.3	364.95	166	148.6	157.3
18	20018280	58	female	32.05	91.34	89.19	90.265	449.9	468.1	459	164.4	176.5	170.45	2.69287	-2.9	0.667	77.38	87.81	82.595	460.5	437.8	449.15	164.4	176.5	170.45	2.63508	-4	0.591	80.15	89.6	84.875	444.7	437.6	441.15	164.4	176.5	170.45	2.58815	-3.9	0.652	82.29	82.44	82.365	450.8	430.4	440.6	164.4	176.5	170.45
19	20019109	68	female	28.9	130.52	125.21	127.865	355.6	362	358.8	96.4	97.1	96.75	3.70853	-1.4	0.883	128.67	127.63	128.15	358.9	369.5	364.2	96.4	97.1	96.75	3.76434	-0.4	0.984	133.58	135.54	134.56	342.8	350.1	346.45	96.4	97.1	96.75	3.58088	0	1.083	158.1	153.26	155.68	326.1	320.7	323.4	96.4	97.1	96.75
20	20019377	61	female	26.37	105.25	102.86	104.055	286.6	295.9	291.25	87	84.3	85.65	3.40047	-1.8	0.797	103.4	105.1	104.25	299.1	307.6	303.35	87	84.3	85.65	3.54174	-1.2	0.896	82.32	87.25	84.785	306.7	302.6	304.65	87	84.3	85.65	3.55692	-1.4	0.929	85.35	77.64	81.495	316.9	307	311.95	87	84.3	85.65
21	20014947	60	female	27.34	126.94	132.2	129.57	476.2	485.8	481	181.2	167.8	174.5	2.75645	-1.1	0.873	126.44	123.8	125.12	451.7	477.8	464.75	181.2	167.8	174.5	2.66332	-2.3	0.774	123.34	116.13	119.735	465.9	438.1	452	181.2	167.8	174.5	2.59026	-1.9	0.877	97.92	105.18	101.55	427.9	434.2	431.05	181.2	167.8	174.5
22	20015360	55	female	24.02	77.79	84.68	81.235	379.1	379.5	379.3	105.5	91.2	98.35	3.85663	-3.1	0.649	81.11	83.39	82.25	402	409.7	405.85	105.5	91.2	98.35	4.12659	-3.5	0.646	55.5	63.21	59.355	408.3	406.9	407.6	105.5	91.2	98.35	4.14438	-4.2	0.626	71.52	71.56	71.54	402.1	388.3	395.2	105.5	91.2	98.35
23	20015622	55	male	26.57	78.65	81.58	80.115	361.7	383.2	372.45	110.2	123.3	116.75	3.19015	-2.7	0.776	86.01	84.47	85.24	405.5	427.3	416.4	110.2	123.3	116.75	3.5666	-2.2	0.852	61.66	70.2	65.93	426.3	417.6	421.95	110.2	123.3	116.75	3.61413	-2.1	0.875	77.08	78.42	77.75	386.1	382.5	384.3	110.2	123.3	116.75
24	20015720	62	male	25.09	95.66	93.2	94.43	310	300.1	305.05	100.9	84.8	92.85	3.28541	-2.5	0.794	99.19	101.45	100.32	320.1	312.3	316.2	100.9	84.8	92.85	3.40549	-2.5	0.819	71.28	85.28	78.28	303.3	302.5	302.9	100.9	84.8	92.85	3.26225	-3	0.772	85.17	92.7	88.935	279.7	266.4	273.05	100.9	84.8	92.85
25	20016110	69	female	22.1	103.66	107.42	105.54	386.7	398.3	392.5	125.4	119.2	122.3	3.20932	-2.4	0.721	79.12	86.66	82.89	426.7	439.8	433.25	125.4	119.2	122.3	3.54252	-2.9	0.706	75.48	81.59	78.535	451.9	448.2	450.05	125.4	119.2	122.3	3.67989	-2.5	0.808	116.95	118.78	117.865	422.3	423.8	423.05	125.4	119.2	122.3
26	20016241	62	male	24.91	145.99	144.45	145.22	412.6	407.1	409.85	129.3	118.9	124.1	3.30258	-2.6	0.791	123.81	128.53	126.17	452.9	428.7	440.8	129.3	118.9	124.1	3.55197	-2.5	0.818	128.17	125.13	126.65	409.7	411.5	410.6	129.3	118.9	124.1	3.30862	-2	0.887	115.19	123.26	119.225	410.1	416.2	413.15	129.3	118.9	124.1
27	20010234	61	male	21.97	105.4	104.97	105.185	502.5	485.6	494.05	152.7	169.7	161.2	3.06483	-2.8	0.768	103.34	105.96	104.65	528.7	507.5	518.1	152.7	169.7	161.2	3.21402	-3	0.763	84.22	97.83	91.025	575.3	561.7	568.5	152.7	169.7	161.2	3.52667	-3	0.771	84.3	99.43	91.865	613.6	602.1	607.85	152.7	169.7	161.2
28	20010577	63	female	31.25	75.17	72.93	74.05	716.7	716.7	716.7	176.1	178.3	177.2	4.04458	-2.9	0.667	63.8	63.09	63.445	737.4	765.3	751.35	176.1	178.3	177.2	4.24012	-3.1	0.682	60.84	61.09	60.965	772.5	736.2	754.35	176.1	178.3	177.2	4.25705	-3.7	0.679	52.89	58.99	55.94	746	694.2	720.1	176.1	178.3	177.2
29	20011004	58	male	24.54	106.89	104.22	105.555	275.3	311.7	293.5	96	108.5	102.25	2.87042	-2.7	0.776	99.46	104.46	101.96	292.4	325.3	308.85	96	108.5	102.25	3.02054	-2.9	0.771	110.67	103.11	106.89	307.4	334.6	321	96	108.5	102.25	3.13936	-3	0.776	84.19	95.76	89.975	299.3	330.9	315.1	96	108.5	102.25
30	20001792	58	female	18.78	167.44	164.29	165.865	377.6	388.9	383.25	119.2	141.6	130.4	2.93903	-1	0.876	161.21	163.02	162.115	411.8	449.7	430.75	119.2	141.6	130.4	3.3033	-1.2	0.9	158.72	160.29	159.505	411.5	393.6	402.55	119.2	141.6	130.4	3.08704	-1.1	0.961	144.11	153.87	148.99	406.5	356.1	381.3	119.2	141.6	130.4
31	20002593	63	female	30.85	155.86	151.98	153.92	355.2	363.3	359.25	94.9	89.1	92	3.90489	0.5	1.043	143.99	140.44	142.215	377.4	368.6	373	94.9	89.1	92	4.05435	1.2	1.159	137.97	145.59	141.78	373.6	350.2	361.9	94.9	89.1	92	3.9337	0.6	1.155	126.95	144.17	135.56	367.5	340.3	353.9	94.9	89.1	92
32	20003805	74	female	22.89	99.86	100.67	100.265	370.9	404.1	387.5	85	97.1	91.05	4.2559	-0.7	0.91	77.48	73.56	75.52	400.9	411.9	406.4	85	97.1	91.05	4.46348	-1.4	0.878	68.35	72.42	70.385	370	384.5	377.25	85	97.1	91.05	4.14333	-2.3	0.831	76.48	70.71	73.595	362.9	356.5	359.7	85	97.1	91.05
33	20003846	79	female	27.89	69.76	69.05	69.405	458.5	448.6	453.55	116.1	118.9	117.5	3.86	-2.6	0.703	54.04	61.25	57.645	505.1	497	501.05	116.1	118.9	117.5	4.26426	-2.4	0.765	44.17	52.25	48.21	506.4	514.5	510.45	116.1	118.9	117.5	4.34426	-2.1	0.856	49.73	56.81	53.27	485.3	472.6	478.95	116.1	118.9	117.5
34	20004030	59	male	21.97	204.25	196.47	200.36	368.4	356.4	362.4	137	169.2	153.1	2.36708	0.1	1.089	165.56	170.39	167.975	360.6	364.6	362.6	137	169.2	153.1	2.36839	0.1	1.102	160.01	170.08	165.045	317.7	322	319.85	137	169.2	153.1	2.08916	0.5	1.162	232.42	230.1	231.26	163.3	155.2	159.25	137	169.2	153.1
35	20007249	64	female	18.37	99.85	96.22	98.035	374.1	361.4	367.75	125.8	138.9	132.35	2.77862	-2.7	0.696	106.34	101.89	104.115	407.6	383.5	395.55	125.8	138.9	132.35	2.98867	-2.3	0.78	103.6	92.05	97.825	423.1	409.7	416.4	125.8	138.9	132.35	3.1462	-1.7	0.893	97.38	93.74	95.56	403.5	405	404.25	125.8	138.9	132.35
36	20008623	67	male	24.02	209.15	203.59	206.37	240.9	244.9	242.9	77.4	82	79.7	3.04768	1.1	1.197	199.96	203.42	201.69	256.9	269.4	263.15	77.4	82	79.7	3.30176	2	1.315	188.7	197.63	193.165	274.2	282.4	278.3	77.4	82	79.7	3.49184	2.6	1.385	218.17	227.74	222.955	273	267.6	270.3	77.4	82	79.7
37	20012676	72	female	27.34	96.74	99.67	98.205	327.9	318.9	323.4	95.8	91.2	93.5	3.45882	-1.5	0.83	104.86	93.03	98.945	358.9	339.5	349.2	95.8	91.2	93.5	3.73476	-1.1	0.912	43.46	46.21	44.835	426	438.8	432.4	95.8	91.2	93.5	4.6246	-0.9	0.989	20.26	24.09	22.175	473	482.4	477.7	95.8	91.2	93.5
38	20030102	55	female	16.44	163.3	164.99	164.145	351.1	366.8	358.95	109.2	128.4	118.8	3.02146	-1.9	0.781	164.13	156.24	160.185	356.3	364.1	360.2	109.2	128.4	118.8	3.03199	-1.1	0.904	154.04	147.01	150.525	366.3	385.9	376.1	109.2	128.4	118.8	3.16582	-1.2	0.95	145.73	149.96	147.845	369.9	359.6	364.75	109.2	128.4	118.8
39	20030404	56	female	25.39	138.7	136.84	137.77	460.8	460.6	460.7	138.7	140	139.35	3.30606	-1.7	0.806	116.29	124.42	120.355	469.6	452.2	460.9	138.7	140	139.35	3.3075	-2.9	0.711	122.82	118.72	120.77	456.3	461.1	458.7	138.7	140	139.35	3.29171	-3	0.749	113.91	111.36	112.635	464.3	463.4	463.85	138.7	140	139.35
40	20030797	54	male	26.57	126	124.09	125.045	386.9	384.1	385.5	176.3	176.1	176.2	2.18785	-2.4	0.81	101.74	126.32	114.03	427	425.4	426.2	176.3	176.1	176.2	2.41884	-1.5	0.926	86.17	92.03	89.1	457.1	462.6	459.85	176.3	176.1	176.2	2.60982	-1.7	0.913	159.24	150.45	154.845	519.6	531.9	525.75	176.3	176.1	176.2
41	20031772	40	female	21.94	231.24	224.79	228.015	238.6	235.8	237.2	92.2	92.5	92.35	2.56849	-0.4	0.946	215.43	215.93	215.68	246.7	248.9	247.8	92.2	92.5	92.35	2.68327	-0.9	0.929	187.4	202.94	195.17	233.4	229.2	231.3	92.2	92.5	92.35	2.5046	-1.3	0.942	197.93	203.57	200.75	216.3	227.1	221.7	92.2	92.5	92.35
42	20031888	46	male	31.14	161.88	161.84	161.86	265.9	273.1	269.5	93.6	82.7	88.15	3.05729	-0.7	0.991	159.7	162.5	161.1	260.5	264.3	262.4	93.6	82.7	88.15	2.97674	-0.3	1.059	157.1	166.1	161.6	258.8	264.2	261.5	93.6	82.7	88.15	2.96653	-0.2	1.085	165.66	169.38	167.52	272.5	266.6	269.55	93.6	82.7	88.15
43	20031480	63	female	21.29	92.95	84.48	88.715	463.7	443.2	453.45	100.6	91.8	96.2	4.71362	-3.1	0.651	85.09	82.7	83.895	454	450	452	100.6	91.8	96.2	4.69854	-3.3	0.669	63.57	82.25	72.91	450.2	451.4	450.8	100.6	91.8	96.2	4.68607	-3.8	0.667	49.64	49.68	49.66	449.4	445.9	447.65	100.6	91.8	96.2
44	20034280	61	female	25.08	135.06	132.75	133.905	263.4	264.7	264.05	82.4	93.2	87.8	3.0074	-1.8	0.794	124.19	130.67	127.43	279.8	258.2	269	82.4	93.2	87.8	3.06378	-1.5	0.862	120.52	122.96	121.74	266.8	265.5	266.15	82.4	93.2	87.8	3.03132	-1.1	0.964	128.73	130.25	129.49	247.4	250.1	248.75	82.4	93.2	87.8
45	20033046	55	male	29.28	95.97	96.59	96.28	406.8	422.5	414.65	188.7	180.9	184.8	2.24378	-3.3	0.711	80.24	88.05	84.145	419.7	422.5	421.1	188.7	180.9	184.8	2.27868	-3.5	0.711	74.09	80.32	77.205	418.7	394.2	406.45	188.7	180.9	184.8	2.1994	-3.2	0.756	160.22	150.52	155.37	411	433	422	188.7	180.9	184.8
46	20035299	32	male	23.95	158.94	162.76	160.85	333.7	325.1	329.4	137	130.8	133.9	2.46004	-1.9	0.869	147.57	153.96	150.765	362.7	359.7	361.2	137	130.8	133.9	2.69754	-1.6	0.917	146.53	158.59	152.56	363.4	349.6	356.5	137	130.8	133.9	2.66243	-1.4	0.944	145.86	151.02	148.44	344.8	313.8	329.3	137	130.8	133.9
47	20034313	51	female	25.15	128.62	125.43	127.025	272.1	279.8	275.95	98.5	90.2	94.35	2.92475	-1.5	0.821	105.55	107.64	106.595	297.6	298.7	298.15	98.5	90.2	94.35	3.16004	-1.4	0.871	99.34	106.18	102.76	304.7	307.8	306.25	98.5	90.2	94.35	3.24589	-0.2	1.058	111.31	117.65	114.48	335.6	324.9	330.25	98.5	90.2	94.35
48	20034498	37	female	27.04	202.75	202.43	202.59	324.9	322.9	323.9	104.7	124.8	114.75	2.82266	-0.7	0.913	201.9	205.68	203.79	323	328.3	325.65	104.7	124.8	114.75	2.83791	-0.4	0.979	200.1	201.98	201.04	319.5	319.4	319.45	104.7	124.8	114.75	2.78388	-0.4	1.038	221.96	217.83	219.895	349.6	333.8	341.7	104.7	124.8	114.75
49	20035307	62	female	25.08	34.78	39.81	37.295	428	416.1	422.05	93.2	101.4	97.3	4.33762	-4	0.55	41.76	50.83	46.295	453.3	462.5	457.9	93.2	101.4	97.3	4.70606	-4.2	0.566	26.71	33.39	30.05	387.6	456.4	422	93.2	101.4	97.3	4.3371	-2.1	0.856	66.42	69.02	67.72	387.7	339.5	363.6	93.2	101.4	97.3
50	20035958	31	male	19.59	206	216.24	211.12	304.2	295.5	299.85	132.4	123	127.7	2.34808	-1	0.965	201.75	216.61	209.18	338.1	312.2	325.15	132.4	123	127.7	2.5462	-0.5	1.042	171.39	181.36	176.375	323.1	346.1	334.6	132.4	123	127.7	2.6202	-0.8	1.011	180.7	183.11	181.905	297.8	325	311.4	132.4	123	127.7
51	20035702	72	female	25.39	124.77	139.1	131.935	457.8	469.6	463.7	188.7	187.9	188.3	2.46256	-1.8	0.794	114.01	119.81	116.91	471.1	470.6	470.85	188.7	187.9	188.3	2.50053	-1.4	0.879	127.66	123.21	125.435	441	458.5	449.75	188.7	187.9	188.3	2.38848	-1.3	0.942	114.49	112.52	113.505	434.4	440.2	437.3	188.7	187.9	188.3
52	20036902	44	female	21.8	244.92	243.95	244.435	333.4	316.5	324.95	105.9	94.3	100.1	3.24625	1.3	1.136	253.87	256.15	255.01	340.6	332.7	336.65	105.9	94.3	100.1	3.36314	2.5	1.301	234.19	234.57	234.38	335	327.8	331.4	105.9	94.3	100.1	3.31069	2	1.303	261	263.7	262.35	330.9	336.7	333.8	105.9	94.3	100.1
53	20026211	56	male	27.12	144.97	143.91	144.44	330.5	292	311.25	110.7	104.1	107.4	2.89804	-1	0.967	132.82	137.39	135.105	322.4	318	320.2	110.7	104.1	107.4	2.98138	-0.3	1.059	132.49	136.69	134.59	335.1	337.1	336.1	110.7	104.1	107.4	3.12942	0	1.102	130.3	139.11	134.705	323.5	331.5	327.5	110.7	104.1	107.4
54	20027001	63	male	21.51	129.53	132.57	131.05	334.4	354.3	344.35	176.3	148.1	162.2	2.123	-2.1	0.846	134.33	129.76	132.045	356.3	365.9	361.1	176.3	148.1	162.2	2.22626	-2.7	0.802	124.91	122.48	123.695	345.6	366.7	356.15	176.3	148.1	162.2	2.19575	-1.9	0.89	110.65	114.89	112.77	346.7	350.4	348.55	176.3	148.1	162.2
55	20028630	54	female	27.78	128.49	124.75	126.62	589.3	538.8	564.05	246.2	227.1	236.65	2.38348	-1.5	0.82	114.78	117.68	116.23	534.1	551	542.55	246.2	227.1	236.65	2.29263	-1.7	0.842	126.81	117.78	122.295	529.4	534.6	532	246.2	227.1	236.65	2.24805	-1.7	0.899	113.89	115.81	114.85	547.6	553.8	550.7	246.2	227.1	236.65
56	20027983	52	female	20.94	178.19	182.13	180.16	351.5	353.8	352.65	150.8	155.3	153.05	2.30415	-1.3	0.85	162.35	167.08	164.715	383.9	384.8	384.35	150.8	155.3	153.05	2.51127	-0.9	0.925	168.23	167.57	167.9	380.4	376.1	378.25	150.8	155.3	153.05	2.47141	-0.7	1.007	169.82	171.73	170.775	368.2	354.5	361.35	150.8	155.3	153.05
57	20025428	56	male	25.51	123.98	125.26	124.62	295	300.7	297.85	77.8	79.8	78.8	3.77982	-2.6	0.788	122.27	123.2	122.735	335.5	340.4	337.95	77.8	79.8	78.8	4.28871	-2.6	0.808	115.47	123	119.235	323.3	322.2	322.75	77.8	79.8	78.8	4.09581	-1.8	0.908	113.23	120.16	116.695	303	292.9	297.95	77.8	79.8	78.8
58	20020330	63	female	23.03	71.61	73.65	72.63	449.5	469.1	459.3	115.9	121.5	118.7	3.86942	-2.3	0.739	62.05	57.39	59.72	464.7	487.2	475.95	115.9	121.5	118.7	4.00969	-2.1	0.797	39.24	47.56	43.4	467.3	506.7	487	115.9	121.5	118.7	4.10278	-3.2	0.735	44.74	48.62	46.68	473.3	515.6	494.45	115.9	121.5	118.7
59	20019597	49	female	22.41	193.04	187.2	190.12	407.1	406.4	406.75	183.4	192.3	187.85	2.16529	-0.3	0.958	165.59	179.85	172.72	419.2	424.8	422	183.4	192.3	187.85	2.24647	-0.6	0.959	180.69	185.45	183.07	402.8	395.7	399.25	183.4	192.3	187.85	2.12537	-0.6	1.017	182.77	188.88	185.825	353.1	368.9	361	183.4	192.3	187.85
60	20020584	50	female	33.65	234.84	237.59	236.215	208	214.4	211.2	66.4	70.4	68.4	3.08772	-0.2	0.966	244.62	233.54	239.08	222.6	225.2	223.9	66.4	70.4	68.4	3.27339	0.5	1.082	215.63	216.55	216.09	235.8	219.1	227.45	66.4	70.4	68.4	3.32529	0.4	1.125	210	202.02	206.01	219.4	204.7	212.05	66.4	70.4	68.4
61	20020923	57	female	24.03	116.29	115.71	116	383.5	390	386.75	102.3	102.3	102.3	3.78055	-2.4	0.721	103.69	100.2	101.945	403.3	403.6	403.45	102.3	102.3	102.3	3.94379	-1.9	0.817	103.26	102.73	102.995	405.4	397.1	401.25	102.3	102.3	102.3	3.92229	-1.9	0.879	114.64	110	112.32	397.8	391.8	394.8	102.3	102.3	102.3
62	20021227	52	male	26.7	189.38	188.44	188.91	395.7	397.3	396.5	151.4	152.8	152.1	2.60684	-1.3	0.928	186.88	193.39	190.135	406.1	404.7	405.4	151.4	152.8	152.1	2.66535	-0.5	1.044	166.71	172.27	169.49	376.2	382	379.1	151.4	152.8	152.1	2.49244	-1.1	0.98	176.24	176.42	176.33	384.1	395.2	389.65	151.4	152.8	152.1
63	20022901	58	male	26.63	158.76	168.7	163.73	429.8	424.5	427.15	166.6	177.6	172.1	2.48199	-1.1	0.957	172.12	168.16	170.14	379.3	390.7	385	166.6	177.6	172.1	2.23707	-0.8	1.001	139.14	148.03	143.585	381.4	411.1	396.25	166.6	177.6	172.1	2.30244	-0.2	1.076	142.37	165.26	153.815	419.4	385.4	402.4	166.6	177.6	172.1
64	20020736	61	female	25.69	97.78	107.25	102.515	294.5	286.7	290.6	85.7	83.9	84.8	3.42689	-1.6	0.809	105.6	101.94	103.77	294.9	287.4	291.15	85.7	83.9	84.8	3.43337	-1.4	0.869	104.39	101.14	102.765	276.1	280.8	278.45	85.7	83.9	84.8	3.28361	-1.6	0.911	117.51	108.35	112.93	254.5	265.8	260.15	85.7	83.9	84.8
65	20020919	47	female	21.37	213.55	214.53	214.04	477.3	477.8	477.55	190.2	184.3	187.25	2.55033	0.6	1.06	196.22	197.24	196.73	508.4	499.4	503.9	190.2	184.3	187.25	2.69105	0.7	1.101	214.36	210.64	212.5	479.4	483.2	481.3	190.2	184.3	187.25	2.57036	1	1.194	191.02	187.72	189.37	467.7	465.9	466.8	190.2	184.3	187.25
66	20024570	36	male	28.09	158.2	162.98	160.59	267.9	264	265.95	86.5	86.4	86.45	3.07634	-1	0.96	139.21	145.99	142.6	278.5	281.8	280.15	86.5	86.4	86.45	3.2406	-0.9	0.992	150.67	158.8	154.735	296.5	285.9	291.2	86.5	86.4	86.45	3.36842	-0.9	1	150.11	157.94	154.025	283.5	290.9	287.2	86.5	86.4	86.45
67	20024416	36	female	33.2	206.33	205.33	205.83	224.2	221.5	222.85	84	83.3	83.65	2.66408	-0.7	0.917	195.22	203.31	199.265	229.7	226.7	228.2	84	83.3	83.65	2.72803	-0.7	0.951	197.39	196.28	196.835	216.4	211.1	213.75	84	83.3	83.65	2.55529	-1.2	0.952	204.19	200.39	202.29	190.5	190.9	190.7	84	83.3	83.65
68	20025025	56	male	26.23	118.16	110.21	114.185	313.2	339.4	326.3	81.6	89.1	85.35	3.82308	-3	0.738	108.86	100.14	104.5	310.6	332.8	321.7	81.6	89.1	85.35	3.76919	-2.7	0.797	97.76	93.05	95.405	305	318.4	311.7	81.6	89.1	85.35	3.65202	-2.7	0.808	86.37	92.01	89.19	277	300.3	288.65	81.6	89.1	85.35
69	20024965	51	male	27.68	134.04	140.76	137.4	229.2	239.5	234.35	69.5	72.3	70.9	3.30536	-2.2	0.834	138.8	133.89	136.345	246.3	237.2	241.75	69.5	72.3	70.9	3.40973	-1.7	0.902	106.05	110.21	108.13	271.3	266	268.65	69.5	72.3	70.9	3.78914	-1.9	0.894	106.47	122.21	114.34	227.1	225.8	226.45	69.5	72.3	70.9
70	20026459	57	female	23.73	155.52	150.42	152.97	377.4	382.7	380.05	85.7	100.4	93.05	4.08436	0	0.987	156.4	146.84	151.62	345	365.2	355.1	85.7	100.4	93.05	3.81623	-0.1	1.019	150.06	142.21	146.135	349.2	357.5	353.35	85.7	100.4	93.05	3.79742	0	1.084	144.73	139.56	142.145	362.8	352.8	357.8	85.7	100.4	93.05
71	20027482	50	female	29.79	191.16	196.17	193.665	221.8	229.3	225.55	93.6	92.6	93.1	2.42266	-0.4	0.943	169.56	187.8	178.68	210.9	217.8	214.35	93.6	92.6	93.1	2.30236	0.1	1.041	186.06	190.35	188.205	216.8	225.5	221.15	93.6	92.6	93.1	2.3754	-0.1	1.074	176.09	185.52	180.805	206.6	206.6	206.6	93.6	92.6	93.1
72	20027368	33	male	26.23	216.89	208.21	212.55	423	407.7	415.35	180.1	191.6	185.85	2.23487	-1.9	0.869	194.02	194.35	194.185	405.8	418.2	412	180.1	191.6	185.85	2.21684	-1.6	0.914	163.16	177.4	170.28	441.7	416.9	429.3	180.1	191.6	185.85	2.30993	-1.1	0.977	182.69	188.56	185.625	437.4	440.7	439.05	180.1	191.6	185.85
73	20027772	50	female	23.03	149.38	154.09	151.735	306	305.3	305.65	101.8	96.1	98.95	3.08893	-1.8	0.796	163.1	161.95	162.525	320.8	318.1	319.45	101.8	96.1	98.95	3.2284	-1.7	0.841	149.6	151.93	150.765	306.3	318.6	312.45	101.8	96.1	98.95	3.15766	-1.4	0.933	161.92	156.51	159.215	258.3	274.5	266.4	101.8	96.1	98.95
74	20028273	60	male	25.56	85.85	86.82	86.335	448.7	453.6	451.15	174.5	177.9	176.2	2.56044	-3	0.746	97.55	91.79	94.67	454.1	438.7	446.4	174.5	177.9	176.2	2.53348	-2.2	0.855	79	84.37	81.685	494.9	450.9	472.9	174.5	177.9	176.2	2.68388	-2.2	0.864	90.69	92.9	91.795	471.6	479.8	475.7	174.5	177.9	176.2
75	20029045	51	male	24.34	166.59	148.41	157.5	500.7	557.4	529.05	203.2	204.5	203.85	2.59529	-0.1	1.064	133.34	140.79	137.065	468.2	452.7	460.45	203.2	204.5	203.85	2.25877	-0.1	1.078	120.28	133.14	126.71	472.8	499.5	486.15	203.2	204.5	203.85	2.38484	-0.8	1.016	135.75	137.51	136.63	483.1	511.7	497.4	203.2	204.5	203.85
76	20029341	65	male	26.81	179.6	176.87	178.235	332.7	340	336.35	98.1	82.9	90.5	3.71657	0.7	1.145	134.09	129.97	132.03	237.7	242.3	240	98.1	82.9	90.5	2.65193	-0.8	1.004	116.35	118.98	117.665	246.1	249.3	247.7	98.1	82.9	90.5	2.73702	0.6	1.17	110	116.82	113.41	267.2	260.4	263.8	98.1	82.9	90.5
77	20033486	50	female	28.63	168.7	167.84	168.27	304.4	308.6	306.5	106.6	107.8	107.2	2.85914	0.1	1.005	166.45	165.24	165.845	311.8	328.7	320.25	106.6	107.8	107.2	2.98741	0.5	1.08	146.69	155.57	151.13	343.6	348.6	346.1	106.6	107.8	107.2	3.22854	0.5	1.135	173.33	166.32	169.825	328.7	320.7	324.7	106.6	107.8	107.2
78	20029748	49	female	23.61	167.18	174.53	170.855	379.9	365.5	372.7	121	114.1	117.55	3.17057	-0.9	0.891	169.54	177.02	173.28	328	300.2	314.1	121	114.1	117.55	2.67205	-1.7	0.836	187.05	183.46	185.255	320.9	305.2	313.05	121	114.1	117.55	2.66312	-2	0.868	166.93	159.84	163.385	308.3	315.6	311.95	121	114.1	117.55
79	20029087	50	female	28.04	117.57	129.63	123.6	431.1	408.7	419.9	152.4	149.1	150.75	2.78541	-1.1	0.864	131.96	130.98	131.47	428.7	415.4	422.05	152.4	149.1	150.75	2.79967	-1.2	0.899	134.7	130.17	132.435	439.4	455.4	447.4	152.4	149.1	150.75	2.96783	-1	0.975	158.1	155.9	157	453.1	471.1	462.1	152.4	149.1	150.75
80	20030448	43	female	25.81	205.2	202.37	203.785	278.5	283.2	280.85	94.6	103	98.8	2.84261	-1.2	0.859	207.62	196.19	201.905	293.5	284.5	289	94.6	103	98.8	2.9251	-1	0.917	191.6	196.28	193.94	287.5	293.8	290.65	94.6	103	98.8	2.9418	-1.8	0.89	210.07	201.56	205.815	287.7	281.6	284.65	94.6	103	98.8
81	20030120	57	male	28.08	96.53	101.5	99.015	320.1	348.2	334.15	86.2	85.6	85.9	3.88999	-2.3	0.821	108.97	107.15	108.06	326.7	328.4	327.55	86.2	85.6	85.9	3.81315	-1.8	0.9	112.96	105.24	109.1	297.6	302.2	299.9	86.2	85.6	85.9	3.49127	-1.5	0.935	114.34	107.9	111.12	310.9	310.1	310.5	86.2	85.6	85.9
82	20031066	67	female	23.42	81.72	90.56	86.14	411.5	411.7	411.6	118.5	117.9	118.2	3.48223	-2.3	0.742	78.94	77.21	78.075	444.8	423.4	434.1	118.5	117.9	118.2	3.67259	-1.2	0.899	64.28	68.83	66.555	446.3	433.8	440.05	118.5	117.9	118.2	3.72293	-1.7	0.894	48.78	58.5	53.64	445.2	439.2	442.2	118.5	117.9	118.2
83	20032167	66	female	24.77	79.94	76.01	77.975	521	503.2	512.1	184.2	175.1	179.65	2.85054	-3.5	0.609	60.48	65.85	63.165	509.7	525.6	517.65	184.2	175.1	179.65	2.88144	-2.9	0.712	44.74	50.4	47.57	495.3	511	503.15	184.2	175.1	179.65	2.80072	-3.2	0.73	51.68	55.96	53.82	493.3	492.2	492.75	184.2	175.1	179.65
84	20032216	66	male	28.34	161.87	157.59	159.73	446.5	441.4	443.95	189.3	181	185.15	2.39779	-0.8	0.989	143.47	142.44	142.955	432.1	440	436.05	189.3	181	185.15	2.35512	-0.5	1.042	128.84	132.6	130.72	407.9	403.8	405.85	189.3	181	185.15	2.19201	-0.4	1.059	145.61	139.45	142.53	449.6	466.5	458.05	189.3	181	185.15
85	20031500	52	male	24.22	124.46	124.36	124.41	212.6	213.7	213.15	62.6	71.5	67.05	3.17897	-1.6	0.897	127.71	126.96	127.335	189	185.1	187.05	62.6	71.5	67.05	2.78971	-0.5	1.034	132.95	131.91	132.43	210.3	216.8	213.55	62.6	71.5	67.05	3.18494	-0.5	1.044	101.92	111.36	106.64	225.1	228.7	226.9	62.6	71.5	67.05
[truncated: 6 more columns]

## Sheet: Sheet2
平均VBQ	total T	TOTAL BMD
2.97794	1.2	1.226
6.8197	0.6	1.113
2.93307	-2.8	0.742
2.00855	-0.9	0.996
3.25459	1.1	1.173
2.0387	-1	0.983
2.41241	-0.2	1.028
4.16233	-1	0.932
3.55015	1.1	1.173
2.33895	-2.4	0.829
3.74514	-1.2	0.919
2.66108	-0.7	0.971
4.179	-2.7	0.754
3.11179	-0.1	1.076
3.4815	-1.1	0.921
3.34771	-1.6	0.914
2.53457	-1.8	0.848
2.62526	-3.7	0.641
3.5991	-0.1	1.041
3.53532	-1.3	0.901
2.62006	-1.7	0.859
4.03648	-3.8	0.631
3.41563	-2.3	0.84
3.22348	-2.3	0.462
3.47271	-2.4	0.784
3.37309	-2.2	0.845
3.39408	-2.8	0.783
4.15138	-3.4	0.67
3.028
3.06336	-1.2	0.919
3.93492	0.9	1.145
4.20332	-1.6	0.872
4.13617	-2.5	0.772
1.9662	1.2	1.218
2.99197	-1.7	0.861
3.30819	2.4	1.353
4.23182	-0.6	0.978
3.07239	-1	0.938
3.30849	-2.6	0.756
2.55009	-1.7	0.97
2.53925	-0.6	0.98
3.01461	-0.3	1.053
4.68789	-3.5	0.665
2.98391	-1.3	0.9
2.25135	-2.7	0.793
2.56983	-1.6	0.915
3.20774	-0.7	0.968
2.85556	-0.1	1.037
4.27942	-2.8	0.736
2.48825	-0.7	1.016
2.41848	-1.3	0.901
3.31369	2.1	1.277
3.01455	-0.1	1.076
2.17347	-2.1	0.86
2.3128	-1.4	0.888
2.41196	0	0.949
3.98636	-2.3	0.843
4.03686	-2.7	0.75
2.11472	-0.3	1.009
3.19664	0.4	1.089
3.87647	-2.1	0.821
2.58161	-0.8	0.998
2.33992	-0.6	1.027
3.30292	-1.2	0.92
2.57617	0.7	1.129
3.25188	-0.9	0.995
2.55678	-0.8	0.962
3.65656	-2.6	0.802
3.42454	-1.9	0.883
3.88581	0.3	1.081
2.32989	-0.1	1.036
2.28101	-1.4	0.936
3.04181	-1.4	0.892
2.6194	-1.7	0.905
2.41973	-0.4	1.042
3.00511	0.3	1.129
3.026	0.7	1.12
2.78988	-1.7	0.865
2.90456	-0.7	0.969
2.89765	-1.4	0.888
3.70227	-1.9	0.885
3.65472	-1.4	0.897
2.81888	-2.9	0.731
2.35471	-0.3	1.063
3.13441	-0.9	0.997

## Sheet: Sheet3
姓名	住院号	L1SI	L2SI	L3SI	L4SI	CSFSI		L1SI	L2SI	L3SI	L4SI	CSFSI	年龄	性别
赵聚贞	20000950	403.7	469.1	446.6	441.7	156.9		415.4	462.2	459.2	451.8	141.1	63	男
高聚民	20020080												60	男
付志金	20021656	271.2	273.9	287	339.1	86.8		2711.6	305.3	314.3	331.4	90.4	63	女
王于姐	20021798	509.6	474	449.8	515.2	164.2		512.2	475.7	466.9	505.8	169	66	女
王力臣	20022508	357.1	352.5	337.3	363.9	181.5		375.3	361	346.3	373.2	175.3	62	男
王玉霞	20022898	341.3	331.3	353.1	363.7	102		340.4	332	337.6	363.1	110.2	56	女
李振山	20023406	327.4	301.7	339.3	350.9	167.6		338	299	350.5	374.5	161.2	67	男
冯刁	20005996	344.8	375	357.6	410	158.3		341.8	354.4	351.4	412	147.1	67	女
张俊稳	20001511	341.2	357.3	372.8	344.4	91.8		371.2	378.3	378.5	338.3	81.3	72	女
王玉霞	20022898	343.4	331	352.4	362.5	99		339.5	333.3	337.4	361.1	95.4	56	女
郑志全	20023410	425	428.6	379.1	333.6	165		438.1	451	386.8	363.1	177.6	65	男
周荣华	20024008												61	女
王风兰	20024572	382.9	408.2	405.6	401.5	101.5		392.6	423.6	412.1	407.8	114.4	68	女
刘俊梅	20024768	501.7	508.9	501.7	534.3	184.5		462.5	525.2	529.7	529.8	200.1	66	女
衣风玲	20025252	299.4	357.8	368.7	356.7	89.4		323.4	330.5	370.2	359.8	76.1	66	女
郭子志	20026211	302.8	322.2	334.5	322	109.5		307.3	325.9	338.9	326.7	97.8	56	男
解存英	20017833	426.7	407.6	382.2	358.7	114.9		416.2	378	374	342.6	106.7	60	女
贾庆合	20017959	324.4	336.8	316.7	282.5	84.8		340.7	316.3	318.8	278.6	103	62	男
时占彩	20016464	469.2	413.4	373.5	360.6	166		445.9	388	369.6	369.3	148.6	55	女
刘雪花	20018280	449.9	460.5	444.7	450.8	164.4		468.1	437.8	437.6	430.4	176.5	58	女
王碍的	20019109	355.6	358.9	342.8	326.1	96.4		362	369.5	350.1	320.7	97.1	68	女
曲桂菊	20019377	286.6	299.1	306.7	316.9	87		295.9	307.6	302.6	307	84.3	61	女
张秋双	20014947	476.2	451.7	465.9	427.9	181.2		485.8	477.8	438.1	434.2	167.8	60	女
张京改	20015360	379.1	402	408.3	402.1	105.5		379.5	409.7	406.9	388.3	91.2	55	女
李建业	20015622												71	男
刘造群	20015622	361.7	405.5	426.3	386.1	110.2		383.2	427.3	417.6	382.5	123.3	55	男
钟宝华	20015720	310	320.1	303.3	279.7	100.9		300.1	312.3	302.5	266.4	84.8	62	男
裴换喜	20016110	386.7	426.7	451.9	422.3	125.4		398.3	439.8	448.2	423.8	119.2	69	女
王食堂	20016241	412.6	452.9	409.7	410.1	129.3		407.1	428.7	411.5	416.2	118.9	62	男
张国平	20010234	502.5	528.7	575.3	613.6	152.7		485.6	507.5	561.7	602.1	169.7	61	男
晏希爱	20010249												63	女
刘丽杰	20010577	716.7	737.4	772.5	746	176.1		716.7	765.3	736.2	694.2	178.3	63	女
王玉珍	20010781												74	女
刘建威	20011004	275.3	292.4	307.4	299.3	96		311.7	325.3	334.6	330.9	108.5	58	男
周伯华	20001792	377.6	411.8	411.5	406.5	119.2		388.9	449.7	393.6	356.1	141.6	58	女
温芹芹	20002593	355.2	377.4	373.6	367.5	94.9		363.3	368.6	350.2	340.3	89.1	63	女
范巧	20003805	370.9	400.9	370	362.9	85		404.1	411.9	384.5	356.5	97.1	74	女
赵俊然	20003846	458.5	505.1	506.4	485.3	116.1		448.6	497	514.5	472.6	118.9	79	女
崔占伟	20004030	368.4	360.6	317.7	163.3	137		356.4	364.6	322	155.2	169.2	59	男
杨秀芝	20007249	374.1	407.6	423.1	403.5	125.8		361.4	383.5	409.7	405	138.9	64	女
潘俊梅	20007982												67	女
刘尚友	20008623	240.9	256.9	274.2	273	77.4		244.9	269.4	282.4	267.6	82	67	男
孙淑彩	20009649												69	女
王菊英	20012676	327.9	358.9	426	473	95.8		318.9	339.5	438.8	482.4	91.2	72	女
庞翠然	20030102	351.1	356.3	366.3	369.9	109.2		366.8	364.1	385.9	359.6	128.4	55	女
张国侠	20030404	460.8	469.6	456.3	464.3	138.7		460.6	452.2	461.1	463.4	140	56	女
孙双安	20030797	386.9	427	457.1	519.6	176.3		384.1	425.4	462.6	531.9	176.1	54	男
刘小梅	20031772	238.6	246.7	233.4	216.3	92.2		235.8	248.9	229.2	227.1	92.5	40	女
王新	20031888	265.9	260.5	258.8	272.5	93.6		273.1	264.3	264.2	266.6	82.7	46	男
李宏萍	20031193												54	女
马立花	20031480	463.7	454	450.2	449.4	100.6		443.2	450	451.4	445.9	91.8	63	女
张锦海	20034280	263.4	279.8	266.8	247.4	82.4		264.7	258.2	265.5	250.1	93.2	61	女
康万庭	20033046	406.8	419.7	418.7	411	188.7		422.5	422.5	394.2	433	180.9	55	男
薄文龙	20035299	333.7	362.7	363.4	344.8	137		325.1	359.7	349.6	313.8	130.8	32	男
李凤玲	20034313	272.1	297.6	304.7	335.6	98.5		279.8	298.7	307.8	324.9	90.2	51	女
曹晶	20034498	324.9	323	319.5	349.6	104.7		322.9	328.3	319.4	333.8	124.8	37	女
赵慧雪	20035300												47	女
陈彦卿	20035307	428	453.3	387.6	387.7	93.2		416.1	462.5	456.4	339.5	101.4	62	女
田凯特	20035958	304.2	338.1	323.1	297.8	132.4		295.5	312.2	346.1	325	123	31	男
王玉英	20035702	457.8	471.1	441	434.4	188.7		469.6	470.6	458.5	440.2	187.9	72	女
周芳芳	20036902	333.4	340.6	335	330.9	105.9		316.5	332.7	327.8	336.7	94.3	44	女
郭子志	20026211	330.5	322.4	335.1	323.5	110.7		292	318	337.1	331.5	104.1	56	男
朵破婉	20027001	334.4	356.3	345.6	346.7	176.3		354.3	365.9	366.7	350.4	148.1	63	男
仝俊匣	20028630	589.3	534.1	529.4	547.6	246.2		538.8	551	534.6	553.8	227.1	54	女
付海英	20027983	351.5	383.9	380.4	368.2	150.8		353.8	384.8	376.1	354.5	155.3	52	女
张进华	20025428	295	335.5	323.3	303	77.8		300.7	340.4	322.2	292.9	79.8	56	男
刘俊然	20020330	449.5	464.7	467.3	473.3	115.9		469.1	487.2	506.7	515.6	121.5	63	女
胡龙勤	20019597	407.1	419.2	402.8	353.1	183.4		406.4	424.8	395.7	368.9	192.3	49	女
韩坦	20020584	208	222.6	235.8	219.4	66.4		214.4	225.2	219.1	204.7	70.4	50	女
韩书文	20020923	383.5	403.3	405.4	397.8	102.3		390	403.6	397.1	391.8	102.3	57	女
孙金通	20021227	395.7	406.1	376.2	384.1	151.4		397.3	404.7	382	395.2	152.8	52	男
徐存柱	20022901	429.8	379.3	381.4	419.4	166.6		424.5	390.7	411.1	385.4	177.6	58	男
周书英	20020736	294.5	294.9	276.1	254.5	85.7		286.7	287.4	280.8	265.8	83.9	61	女
冀玉敏	20020919	477.3	508.4	479.4	467.7	190.2		477.8	499.4	483.2	465.9	184.3	47	女
杨俊杰	20024570	267.9	278.5	296.5	283.5	86.5		264	281.8	285.9	290.9	86.4	36	男
彭英欣	20024416	224.2	229.7	216.4	190.5	84		221.5	226.7	211.1	190.9	83.3	36	女
顾节春	20025025	313.2	310.6	305	277	81.6		339.4	332.8	318.4	300.3	89.1	56	男
谷荣山	20024965	229.2	246.3	271.3	227.1	69.5		239.5	237.2	266	225.8	72.3	51	男
吕子芬	20026459	377.4	345	349.2	362.8	85.7		382.7	365.2	357.5	352.8	100.4	57	女
张秀琼	20027482	221.8	210.9	216.8	206.6	93.6		229.3	217.8	225.5	206.6	92.6	50	女
路士良	20027368	423	405.8	441.7	437.4	180.1		407.7	418.2	416.9	440.7	191.6	33	男
赖润连	20027772	306	320.8	306.3	258.3	101.8		305.3	318.1	318.6	274.5	96.1	50	女
张建国	20028273	448.7	454.1	494.9	471.6	174.5		453.6	438.7	450.9	479.8	177.9	60	男
王建科	20029045	500.7	468.2	472.8	483.1	203.2		557.4	452.7	499.5	511.7	204.5	51	男
江安发	20029341	332.7	237.7	246.1	267.2	98.1		340	242.3	249.3	260.4	82.9	65	男
张雅君	20033486	304.4	311.8	343.6	328.7	106.6		308.6	328.7	348.6	320.7	107.8	50	女
王春利	20029748	379.9	328	320.9	308.3	121		365.5	300.2	305.2	315.6	114.1	49	女
陶竹英	20029087	431.1	428.7	439.4	453.1	152.4		408.7	415.4	455.4	471.1	149.1	50	女
郭换琴	20030448	278.5	293.5	287.5	287.7	94.6		283.2	284.5	293.8	281.6	103	43	女
张银生	20030120	320.1	326.7	297.6	310.9	86.2		348.2	328.4	302.2	310.1	85.6	57	男
林兰玉	20031066	411.5	444.8	446.3	445.2	118.5		411.7	423.4	433.8	439.2	117.9	67	女
杨秀彦	20032167	521	509.7	495.3	493.3	184.2		503.2	525.6	511	492.2	175.1	66	女
武树海	20032216	446.5	432.1	407.9	449.6	189.3		441.4	440	403.8	466.5	181	66	男
张运永	20031500	212.6	189	210.3	225.1	62.6		213.7	185.1	216.8	228.7	71.5	52	男
